# Supplementary material for: The pore network and the adsorption characteristics of mesoporous silica aerogel: adsorption kinetics on a timescale of seconds
Source: Royal Society of Chemistry journal article supplement (doi:10.1039/c5ra21353c), 2015-01-01
Supplement: c5ra21353c1.pdf [file c5ra21353c1.pdf]

***Supporting Information for***

**The Pore Network and the Adsorption Characteristics of  
Mesoporous Silica Aerogel: Adsorption Kinetics on a  
Timescale of Seconds**

József Kalmár<sup>a\*</sup>, Mónika Kéri<sup>b</sup>, Zsolt Erdei<sup>c</sup>, István Bányai<sup>b</sup>, István Lázár<sup>c</sup>,  
Gábor Lente<sup>c</sup> and István Fábián<sup>c</sup>

<sup>a</sup> MTA-DE Homogeneous Catalysis and Reaction Mechanisms Research Group, Egyetem tér 1, H-4032 Hungary

<sup>b</sup> Department of Colloid and Environmental Chemistry, University of Debrecen, Egyetem tér 1, H-4032 Hungary

<sup>c</sup> Department of Inorganic and Analytical Chemistry, University of Debrecen, Egyetem tér 1, H-4032 Hungary

\* Corresponding author: e-mail: [kalmar.jozsef@science.unideb.hu](mailto:kalmar.jozsef@science.unideb.hu)

## Nitrogen porometry of the dry aerogel:

Quantachrome NovaWin - Data Acquisition and Reduction  
for NOVA instruments  
©1994-2010, Quantachrome Instruments  
version 11.0

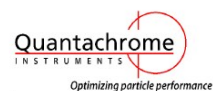

### Analysis

Operator:AerogelLab  
Sample ID: KE-10

Date:2015/03/20  
Filename:

### Report

Operator:AerogelLab  
C:\QCdata\Physisorb\KE-10.qps

Date:4/9/2015

## Isotherm

| Relative Pressure | Volume @ STP<br>[cc/g] | Relative Pressure | Volume @ STP<br>[cc/g] | Relative Pressure | Volume @ STP<br>[cc/g] |
|-------------------|------------------------|-------------------|------------------------|-------------------|------------------------|
| 4.59500e-03       | 117.3788               | 7.78239e-01       | 570.2218               | 7.24804e-01       | 644.1934               |
| 6.20900e-03       | 125.1163               | 7.95381e-01       | 587.7940               | 6.99596e-01       | 607.8998               |
| 1.06310e-02       | 140.3717               | 8.20460e-01       | 614.0372               | 6.82569e-01       | 584.5793               |
| 1.68750e-02       | 154.7747               | 8.36550e-01       | 635.7924               | 6.63094e-01       | 565.9544               |
| 6.41740e-02       | 205.5995               | 8.55154e-01       | 664.3955               | 6.43445e-01       | 544.7244               |
| 9.55050e-02       | 225.9026               | 8.75292e-01       | 698.3475               | 6.21781e-01       | 527.6891               |
| 1.40361e-01       | 248.1658               | 8.96115e-01       | 741.5098               | 6.04912e-01       | 512.7755               |
| 1.78347e-01       | 264.7490               | 9.16339e-01       | 797.5208               | 5.81454e-01       | 496.0251               |
| 2.15245e-01       | 280.2587               | 9.36384e-01       | 888.0622               | 5.60459e-01       | 479.5198               |
| 2.56026e-01       | 295.6425               | 9.54980e-01       | 1047.3297              | 5.42287e-01       | 468.7991               |
| 2.97108e-01       | 311.1668               | 9.75976e-01       | 1970.4994              | 5.19030e-01       | 452.6769               |
| 3.38220e-01       | 326.1445               | 9.80549e-01       | 3836.8341              | 5.04568e-01       | 443.5763               |
| 3.79252e-01       | 341.9842               | 9.85087e-01       | 4209.1974              | 4.61965e-01       | 419.5782               |
| 4.18275e-01       | 357.1890               | 9.91000e-01       | 4781.6923              | 4.23101e-01       | 396.7614               |
| 4.59300e-01       | 375.3219               | 9.88436e-01       | 4780.6416              | 3.82637e-01       | 376.0169               |
| 4.97409e-01       | 389.9705               | 9.88040e-01       | 4773.6272              | 3.41562e-01       | 353.9203               |
| 5.18209e-01       | 399.5852               | 9.84035e-01       | 4674.8408              | 3.01559e-01       | 332.7234               |
| 5.35200e-01       | 409.2308               | 9.64949e-01       | 4096.8807              | 2.59440e-01       | 311.9851               |
| 5.56411e-01       | 420.0262               | 9.44421e-01       | 3521.4295              | 2.19063e-01       | 290.5330               |
| 5.75577e-01       | 429.9238               | 9.24881e-01       | 3135.5462              | 1.80270e-01       | 270.0771               |
| 5.96284e-01       | 439.6438               | 9.04325e-01       | 2839.4637              | 1.43502e-01       | 249.0135               |
| 6.16134e-01       | 452.0632               | 8.84555e-01       | 2526.9761              | 1.03802e-01       | 223.9096               |
| 6.39369e-01       | 464.7054               | 8.63985e-01       | 2176.2634              | 5.64460e-02       | 187.4070               |
| 6.60126e-01       | 478.3503               | 8.44329e-01       | 1644.0337              | 2.31630e-02       | 147.9990               |
| 6.76865e-01       | 490.7141               | 8.24141e-01       | 1197.0243              | 1.85460e-02       | 139.7889               |
| 6.95454e-01       | 502.9364               | 8.03794e-01       | 956.3965               | 1.27990e-02       | 127.1067               |
| 7.17163e-01       | 519.4899               | 7.83115e-01       | 825.4082               | 9.61500e-03       | 118.0342               |
| 7.38864e-01       | 533.8366               | 7.64295e-01       | 746.3590               |                   |                        |
| 7.59772e-01       | 550.7087               | 7.43235e-01       | 683.2997               |                   |                        |

**Quantachrome NovaWin - Data Acquisition and Reduction  
for NOVA instruments  
©1994-2010, Quantachrome Instruments  
version 11.0**

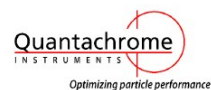

**Analysis**

Operator:AerogelLab  
Sample ID: KE-10

Date:2015/03/20  
Filename:

**Report**

Operator:AerogelLab  
C:\QCdata\Physisorb\KE-10.qps

Date:4/9/2015

**DFT method Pore Size Distribution**

| Pore width<br>[nm] | Cumulative<br>Pore Volume<br>[cc/g] | Cumulative<br>Surface Area<br>[m <sup>2</sup> /g] | dV(d)<br>[cc/nm/g] | dS(d)<br>[m <sup>2</sup> /nm/g] |
|--------------------|-------------------------------------|---------------------------------------------------|--------------------|---------------------------------|
| 1.3790             | 0.0000e+00                          | 0.0000e+00                                        | 0.0000e+00         | 0.0000e+00                      |
| 1.4320             | 0.0000e+00                          | 0.0000e+00                                        | 0.0000e+00         | 0.0000e+00                      |
| 1.4980             | 0.0000e+00                          | 0.0000e+00                                        | 0.0000e+00         | 0.0000e+00                      |
| 1.5640             | 0.0000e+00                          | 0.0000e+00                                        | 0.0000e+00         | 0.0000e+00                      |
| 1.6310             | 0.0000e+00                          | 0.0000e+00                                        | 0.0000e+00         | 0.0000e+00                      |
| 1.6970             | 0.0000e+00                          | 0.0000e+00                                        | 0.0000e+00         | 0.0000e+00                      |
| 1.7800             | 0.0000e+00                          | 0.0000e+00                                        | 0.0000e+00         | 0.0000e+00                      |
| 1.8680             | 0.0000e+00                          | 0.0000e+00                                        | 0.0000e+00         | 0.0000e+00                      |
| 1.9480             | 0.0000e+00                          | 0.0000e+00                                        | 0.0000e+00         | 0.0000e+00                      |
| 2.0270             | 0.0000e+00                          | 0.0000e+00                                        | 0.0000e+00         | 0.0000e+00                      |
| 2.1070             | 0.0000e+00                          | 0.0000e+00                                        | 0.0000e+00         | 0.0000e+00                      |
| 2.1860             | 0.0000e+00                          | 0.0000e+00                                        | 0.0000e+00         | 0.0000e+00                      |
| 2.2660             | 0.0000e+00                          | 0.0000e+00                                        | 0.0000e+00         | 0.0000e+00                      |
| 2.3450             | 0.0000e+00                          | 0.0000e+00                                        | 0.0000e+00         | 0.0000e+00                      |
| 2.4250             | 0.0000e+00                          | 0.0000e+00                                        | 0.0000e+00         | 0.0000e+00                      |
| 2.5040             | 0.0000e+00                          | 0.0000e+00                                        | 0.0000e+00         | 0.0000e+00                      |
| 2.5830             | 0.0000e+00                          | 0.0000e+00                                        | 0.0000e+00         | 0.0000e+00                      |
| 2.7030             | 0.0000e+00                          | 0.0000e+00                                        | 0.0000e+00         | 0.0000e+00                      |
| 2.8220             | 0.0000e+00                          | 0.0000e+00                                        | 0.0000e+00         | 0.0000e+00                      |
| 2.9410             | 0.0000e+00                          | 0.0000e+00                                        | 0.0000e+00         | 0.0000e+00                      |
| 3.0600             | 0.0000e+00                          | 0.0000e+00                                        | 0.0000e+00         | 0.0000e+00                      |
| 3.1790             | 0.0000e+00                          | 0.0000e+00                                        | 0.0000e+00         | 0.0000e+00                      |
| 3.2980             | 0.0000e+00                          | 0.0000e+00                                        | 0.0000e+00         | 0.0000e+00                      |
| 3.4180             | 0.0000e+00                          | 0.0000e+00                                        | 0.0000e+00         | 0.0000e+00                      |
| 3.5370             | 0.0000e+00                          | 0.0000e+00                                        | 0.0000e+00         | 0.0000e+00                      |
| 3.6560             | 0.0000e+00                          | 0.0000e+00                                        | 0.0000e+00         | 0.0000e+00                      |
| 3.7750             | 0.0000e+00                          | 0.0000e+00                                        | 0.0000e+00         | 0.0000e+00                      |
| 3.9340             | 0.0000e+00                          | 0.0000e+00                                        | 0.0000e+00         | 0.0000e+00                      |
| 4.0930             | 0.0000e+00                          | 0.0000e+00                                        | 0.0000e+00         | 0.0000e+00                      |
| 4.2520             | 0.0000e+00                          | 0.0000e+00                                        | 0.0000e+00         | 0.0000e+00                      |
| 4.4110             | 0.0000e+00                          | 0.0000e+00                                        | 0.0000e+00         | 0.0000e+00                      |
| 4.5700             | 0.0000e+00                          | 0.0000e+00                                        | 0.0000e+00         | 0.0000e+00                      |
| 4.7280             | 0.0000e+00                          | 0.0000e+00                                        | 0.0000e+00         | 0.0000e+00                      |
| 4.8870             | 0.0000e+00                          | 0.0000e+00                                        | 0.0000e+00         | 0.0000e+00                      |
| 5.0860             | 0.0000e+00                          | 0.0000e+00                                        | 0.0000e+00         | 0.0000e+00                      |
| 5.2850             | 0.0000e+00                          | 0.0000e+00                                        | 0.0000e+00         | 0.0000e+00                      |
| 5.4830             | 0.0000e+00                          | 0.0000e+00                                        | 0.0000e+00         | 0.0000e+00                      |
| 5.6820             | 0.0000e+00                          | 0.0000e+00                                        | 0.0000e+00         | 0.0000e+00                      |
| 5.8800             | 0.0000e+00                          | 0.0000e+00                                        | 0.0000e+00         | 0.0000e+00                      |
| 6.0790             | 0.0000e+00                          | 0.0000e+00                                        | 0.0000e+00         | 0.0000e+00                      |
| 6.3170             | 0.0000e+00                          | 0.0000e+00                                        | 0.0000e+00         | 0.0000e+00                      |
| 6.5560             | 0.0000e+00                          | 0.0000e+00                                        | 0.0000e+00         | 0.0000e+00                      |
| 6.7940             | 0.0000e+00                          | 0.0000e+00                                        | 0.0000e+00         | 0.0000e+00                      |
| 7.0320             | 0.0000e+00                          | 0.0000e+00                                        | 0.0000e+00         | 0.0000e+00                      |
| 7.3100             | 0.0000e+00                          | 0.0000e+00                                        | 0.0000e+00         | 0.0000e+00                      |
| 7.5880             | 0.0000e+00                          | 0.0000e+00                                        | 0.0000e+00         | 0.0000e+00                      |
| 7.8670             | 0.0000e+00                          | 0.0000e+00                                        | 0.0000e+00         | 0.0000e+00                      |
| 8.1450             | 0.0000e+00                          | 0.0000e+00                                        | 0.0000e+00         | 0.0000e+00                      |
| 8.4620             | 0.0000e+00                          | 0.0000e+00                                        | 0.0000e+00         | 0.0000e+00                      |
| 8.7800             | 0.0000e+00                          | 0.0000e+00                                        | 0.0000e+00         | 0.0000e+00                      |
| 9.0980             | 0.0000e+00                          | 0.0000e+00                                        | 0.0000e+00         | 0.0000e+00                      |
| 9.4160             | 0.0000e+00                          | 0.0000e+00                                        | 0.0000e+00         | 0.0000e+00                      |
| 9.7730             | 0.0000e+00                          | 0.0000e+00                                        | 0.0000e+00         | 0.0000e+00                      |
| 10.1310            | 0.0000e+00                          | 0.0000e+00                                        | 0.0000e+00         | 0.0000e+00                      |
| 10.4880            | 4.9846e-03                          | 1.9011e+00                                        | 1.3962e-02         | 5.3251e+00                      |
| 10.8850            | 4.1399e-02                          | 1.5282e+01                                        | 9.1723e-02         | 3.3706e+01                      |
| 11.2830            | 1.0154e-01                          | 3.6605e+01                                        | 1.5112e-01         | 5.3573e+01                      |
| 11.6800            | 1.7862e-01                          | 6.3002e+01                                        | 1.9416e-01         | 6.6493e+01                      |

Continued on next page



**Quantachrome NovaWin - Data Acquisition and Reduction  
for NOVA instruments  
©1994-2010, Quantachrome Instruments  
version 11.0**

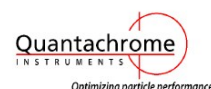

**Analysis**

Operator:AerogelLab  
Sample ID: KE-10

Date:2015/03/20  
Filename:

**Report**

Operator:AerogelLab  
C:\QCdata\Physisorb\KE-10.qps

Date:4/9/2015

**DFT method Pore Size Distribution** continued

| Pore width<br>[nm] | Cumulative<br>Pore Volume<br>[cc/g] | Cumulative<br>Surface Area<br>[m <sup>2</sup> /g] | dV(d)<br>[cc/nm/g] | dS(d)<br>[m <sup>2</sup> /nm/g] |
|--------------------|-------------------------------------|---------------------------------------------------|--------------------|---------------------------------|
| 12.1170            | 2.8065e-01                          | 9.6683e+01                                        | 2.3347e-01         | 7.7073e+01                      |
| 12.5540            | 3.8858e-01                          | 1.3107e+02                                        | 2.4697e-01         | 7.8691e+01                      |
| 12.9910            | 5.1864e-01                          | 1.7112e+02                                        | 2.9763e-01         | 9.1641e+01                      |
| 13.4670            | 6.9061e-01                          | 2.2220e+02                                        | 3.6128e-01         | 1.0731e+02                      |
| 13.9440            | 8.8158e-01                          | 2.7698e+02                                        | 4.0035e-01         | 1.1485e+02                      |
| 14.4600            | 1.1194e+00                          | 3.4278e+02                                        | 4.6097e-01         | 1.2752e+02                      |
| 14.9770            | 1.3778e+00                          | 4.1177e+02                                        | 4.9970e-01         | 1.3346e+02                      |
| 15.5330            | 1.6478e+00                          | 4.8131e+02                                        | 4.8562e-01         | 1.2506e+02                      |
| 16.0890            | 1.9404e+00                          | 5.5406e+02                                        | 5.2633e-01         | 1.3086e+02                      |
| 16.6850            | 2.2682e+00                          | 6.3264e+02                                        | 5.4995e-01         | 1.3184e+02                      |
| 17.2810            | 2.5629e+00                          | 7.0086e+02                                        | 4.9450e-01         | 1.1446e+02                      |
| 17.9160            | 2.8079e+00                          | 7.5556e+02                                        | 3.8583e-01         | 8.6142e+01                      |
| 18.5520            | 2.9521e+00                          | 7.8664e+02                                        | 2.2663e-01         | 4.8865e+01                      |
| 19.2270            | 3.1246e+00                          | 8.2253e+02                                        | 2.5563e-01         | 5.3181e+01                      |
| 19.9020            | 3.2999e+00                          | 8.5777e+02                                        | 2.5969e-01         | 5.2194e+01                      |
| 20.6170            | 3.4323e+00                          | 8.8345e+02                                        | 1.8519e-01         | 3.5930e+01                      |
| 21.3720            | 3.5658e+00                          | 9.0844e+02                                        | 1.7680e-01         | 3.3090e+01                      |
| 22.1270            | 3.6971e+00                          | 9.3216e+02                                        | 1.7385e-01         | 3.1427e+01                      |
| 22.9210            | 3.8156e+00                          | 9.5285e+02                                        | 1.4930e-01         | 2.6055e+01                      |
| 23.7550            | 3.9438e+00                          | 9.7444e+02                                        | 1.5371e-01         | 2.5883e+01                      |
| 24.6290            | 4.0444e+00                          | 9.9078e+02                                        | 1.1512e-01         | 1.8697e+01                      |
| 25.5030            | 4.1390e+00                          | 1.0056e+03                                        | 1.0826e-01         | 1.6980e+01                      |
| 26.4170            | 4.2305e+00                          | 1.0195e+03                                        | 1.0005e-01         | 1.5149e+01                      |
| 27.3700            | 4.3193e+00                          | 1.0325e+03                                        | 9.3257e-02         | 1.3629e+01                      |
| 28.3630            | 4.4144e+00                          | 1.0459e+03                                        | 9.5769e-02         | 1.3506e+01                      |
| 29.3960            | 4.4849e+00                          | 1.0555e+03                                        | 6.8214e-02         | 9.2822e+00                      |
| 30.4680            | 4.5555e+00                          | 1.0647e+03                                        | 6.5840e-02         | 8.6438e+00                      |
| 31.5410            | 4.6294e+00                          | 1.0741e+03                                        | 6.8913e-02         | 8.7395e+00                      |
| 32.6530            | 4.7172e+00                          | 1.0848e+03                                        | 7.8883e-02         | 9.6632e+00                      |
| 33.8050            | 4.7934e+00                          | 1.0939e+03                                        | 6.6182e-02         | 7.8309e+00                      |
| 34.9970            | 4.8891e+00                          | 1.1048e+03                                        | 8.0258e-02         | 9.1732e+00                      |
| 36.2280            | 4.9675e+00                          | 1.1135e+03                                        | 6.3751e-02         | 7.0388e+00                      |
| 37.4990            | 5.0438e+00                          | 1.1216e+03                                        | 5.9966e-02         | 6.3965e+00                      |
| 38.8100            | 5.1226e+00                          | 1.1297e+03                                        | 6.0104e-02         | 6.1947e+00                      |
| 40.1600            | 5.1983e+00                          | 1.1373e+03                                        | 5.6144e-02         | 5.5920e+00                      |
| 41.5510            | 5.2574e+00                          | 1.1429e+03                                        | 4.2453e-02         | 4.0869e+00                      |
| 42.9810            | 5.3235e+00                          | 1.1491e+03                                        | 4.6199e-02         | 4.2995e+00                      |
| 44.4500            | 5.4004e+00                          | 1.1560e+03                                        | 5.2395e-02         | 4.7149e+00                      |
| 45.9600            | 5.5008e+00                          | 1.1648e+03                                        | 6.6483e-02         | 5.7862e+00                      |
| 47.5090            | 5.5839e+00                          | 1.1718e+03                                        | 5.3616e-02         | 4.5142e+00                      |
| 49.0980            | 5.6271e+00                          | 1.1753e+03                                        | 2.7204e-02         | 2.2163e+00                      |
| 50.7270            | 5.6948e+00                          | 1.1806e+03                                        | 4.1562e-02         | 3.2773e+00                      |
| 52.3950            | 5.7430e+00                          | 1.1843e+03                                        | 2.8884e-02         | 2.2050e+00                      |
| 54.1030            | 5.8056e+00                          | 1.1889e+03                                        | 3.6682e-02         | 2.7121e+00                      |
| 55.8510            | 5.8696e+00                          | 1.1935e+03                                        | 3.6598e-02         | 2.6212e+00                      |
| 57.6380            | 5.9240e+00                          | 1.1973e+03                                        | 3.0430e-02         | 2.1117e+00                      |
| 59.4650            | 5.9878e+00                          | 1.2016e+03                                        | 3.4949e-02         | 2.3509e+00                      |
| 61.3320            | 6.0570e+00                          | 1.2061e+03                                        | 3.7031e-02         | 2.4151e+00                      |
| 63.2390            | 6.0979e+00                          | 1.2087e+03                                        | 2.1450e-02         | 1.3568e+00                      |
| 65.1850            | 6.1523e+00                          | 1.2120e+03                                        | 2.7950e-02         | 1.7151e+00                      |
| 67.1710            | 6.2065e+00                          | 1.2152e+03                                        | 2.7326e-02         | 1.6273e+00                      |
| 69.1970            | 6.2578e+00                          | 1.2182e+03                                        | 2.5277e-02         | 1.4612e+00                      |
| 71.2630            | 6.3072e+00                          | 1.2210e+03                                        | 2.3947e-02         | 1.3441e+00                      |
| 73.3680            | 6.3480e+00                          | 1.2232e+03                                        | 1.9380e-02         | 1.0566e+00                      |
| 75.5130            | 6.3480e+00                          | 1.2232e+03                                        | 0.0000e+00         | 0.0000e+00                      |

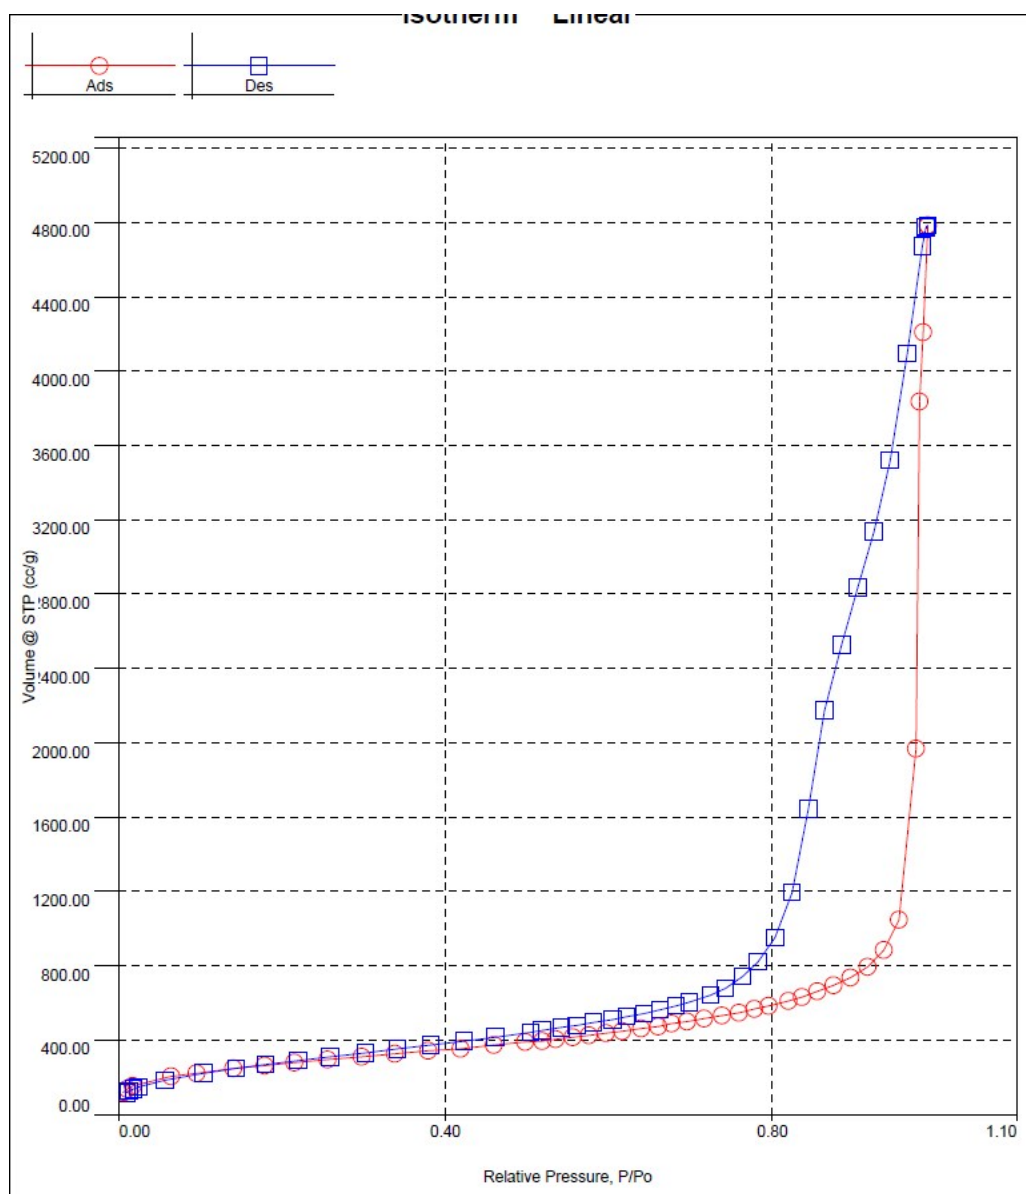

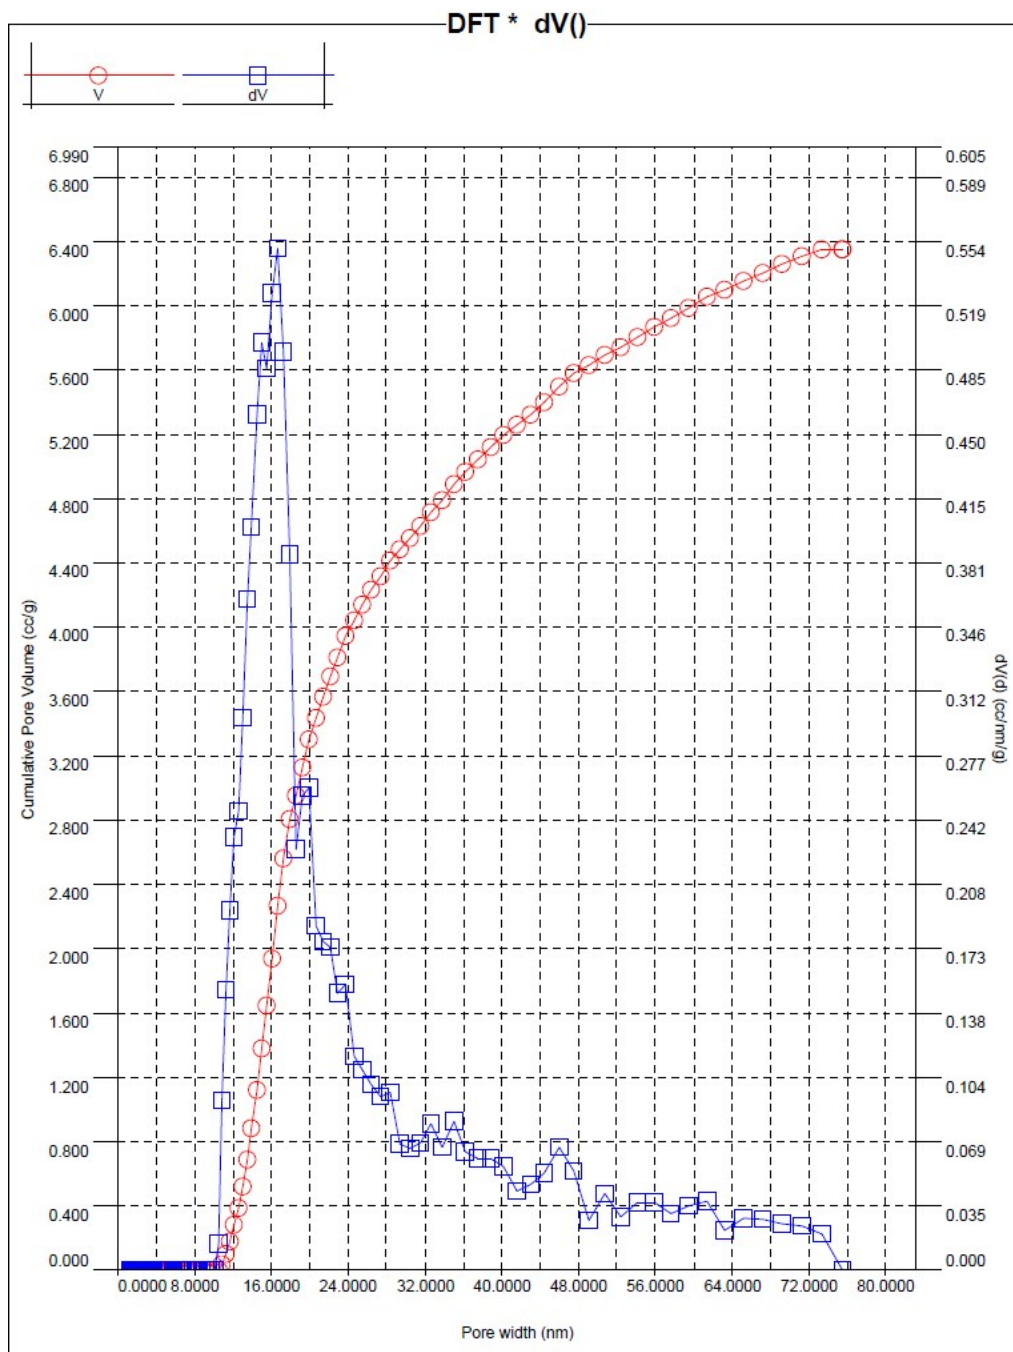

### Infrared spectroscopy:

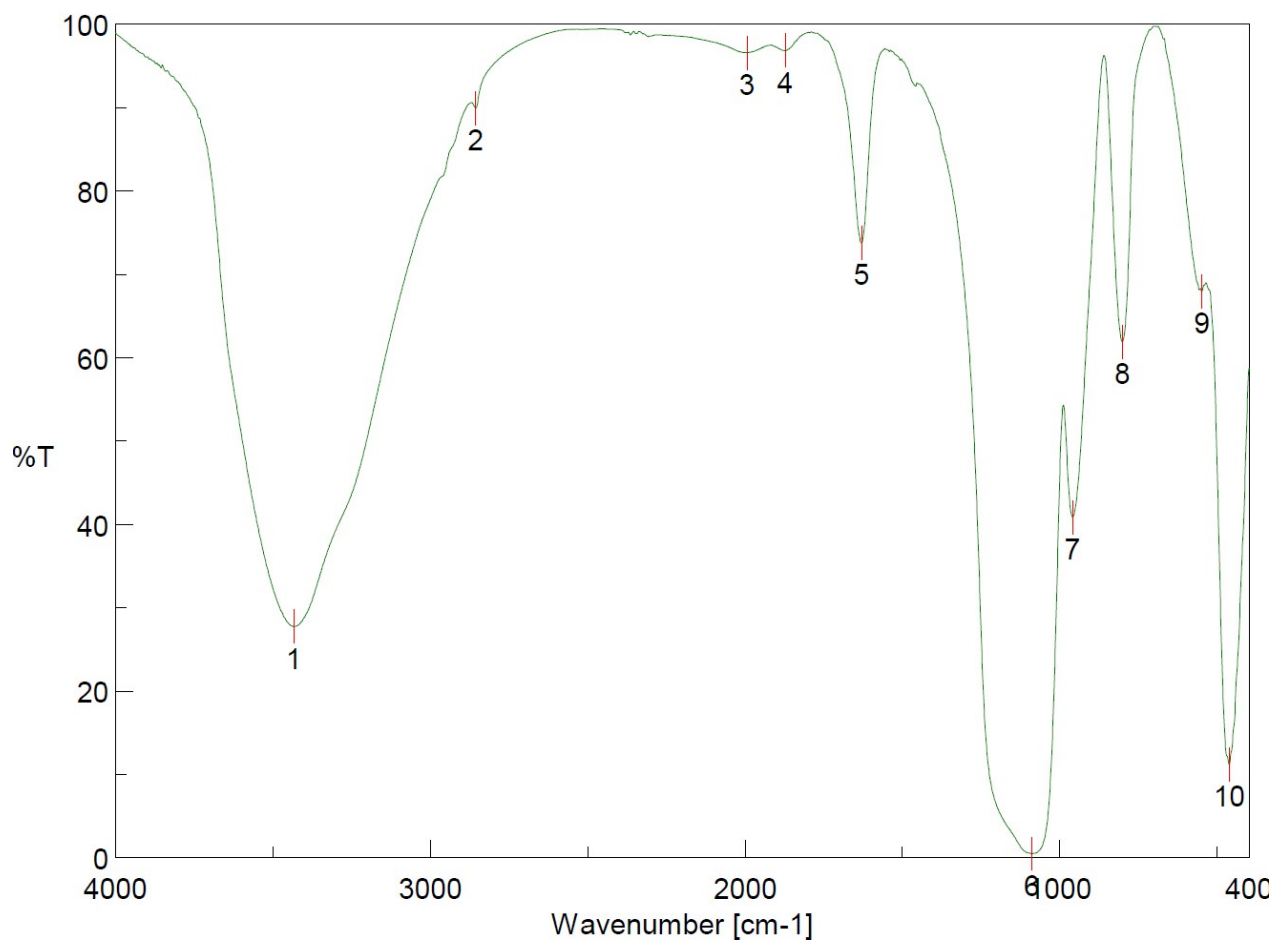

- 1: 3434 cm<sup>-1</sup>: (adsorbed water)
- 2: 2856 cm<sup>-1</sup>
- 3: 1994 cm<sup>-1</sup>
- 4: 1873 cm<sup>-1</sup>
- 5: 1631 cm<sup>-1</sup>: (adsorbed water)
- 6: 1090 cm<sup>-1</sup>: Si–O–Si asymmetric stretching
- 7: 960 cm<sup>-1</sup>: Si–OH stretching
- 8: 802 cm<sup>-1</sup>: Si–O–Si symmetric stretching
- 9: 550 cm<sup>-1</sup>
- 10: 463 cm<sup>-1</sup>: Si–O–Si bending

**Figure S1.** Transmission IR spectrum of the calcined silica aerogel.



**Microscopy of the aerogel suspension:**

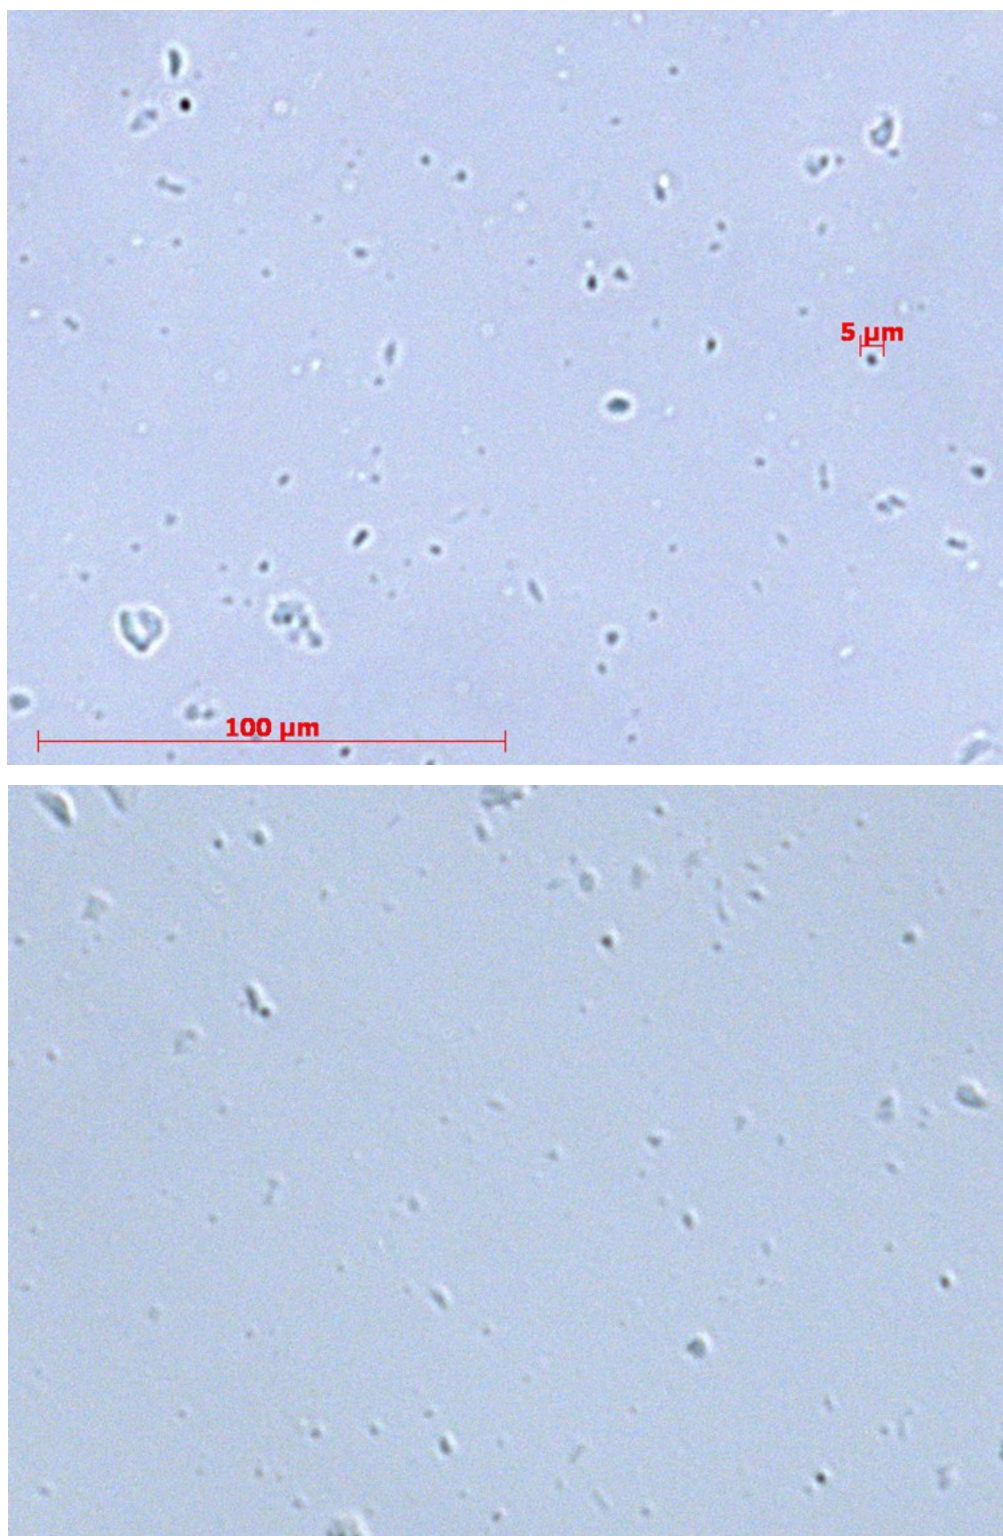

**Figure S2A.** Micrograph of a fresh aerogel suspension. Small, homogeneous particles (5 – 10 μM) dominate.



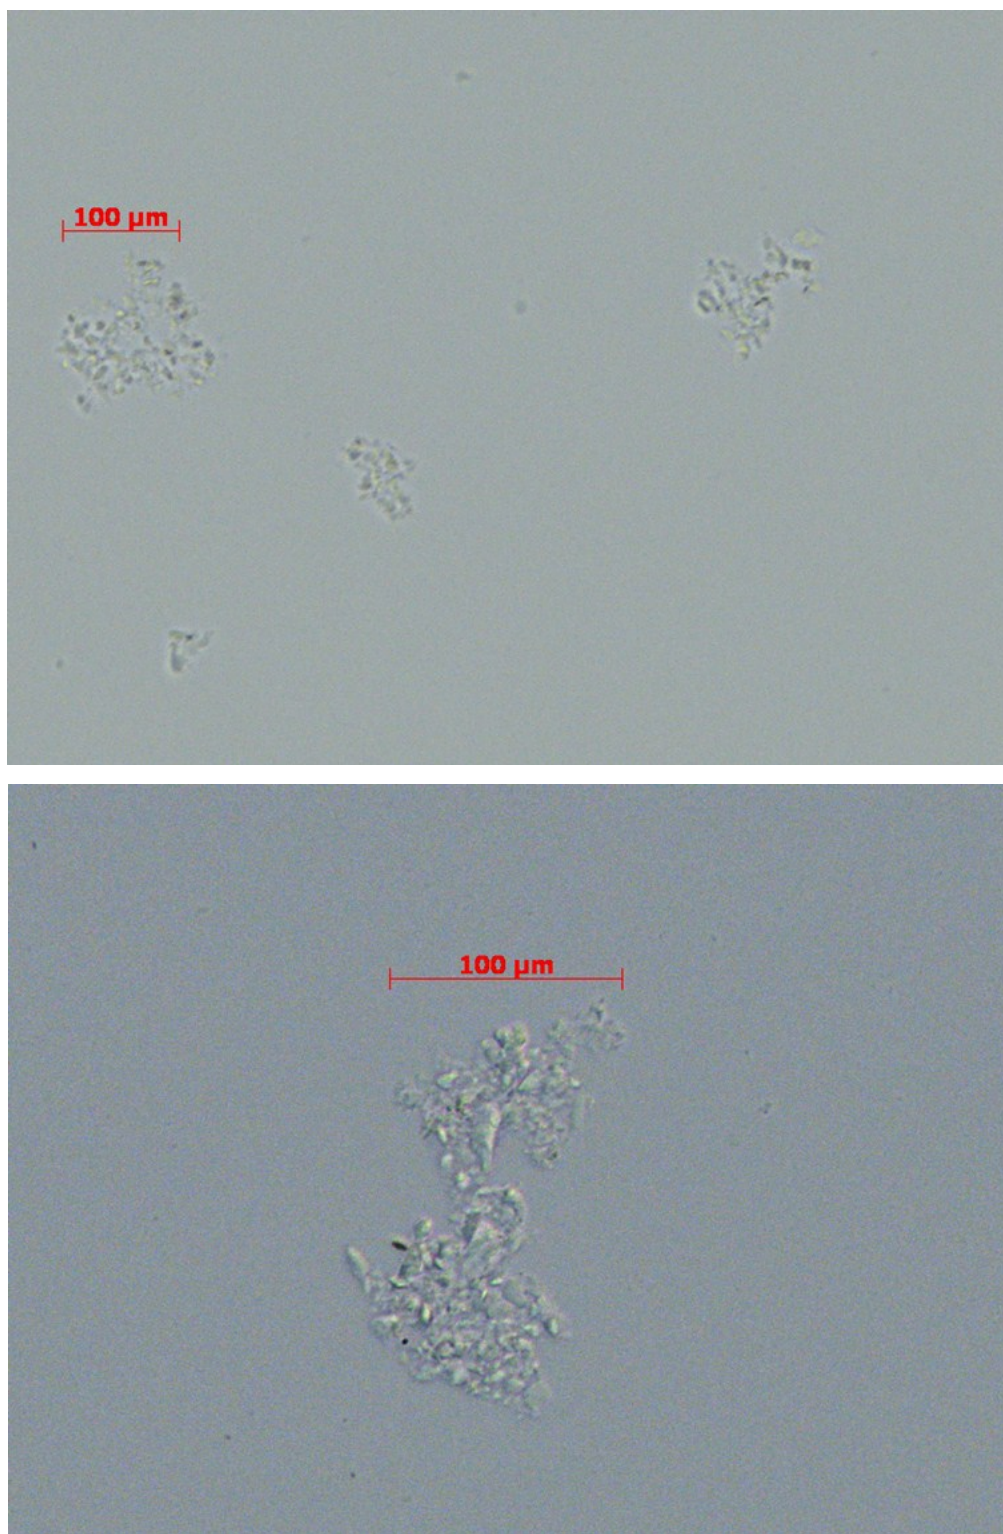

**Figure S2B.** Micrograph of a 2 h aerogel suspension. Small aerogel particles spontaneously aggregate to larger (20 – 100  $\mu$ M) blocks.

### Self-diffusion of water in the aerogel suspension:

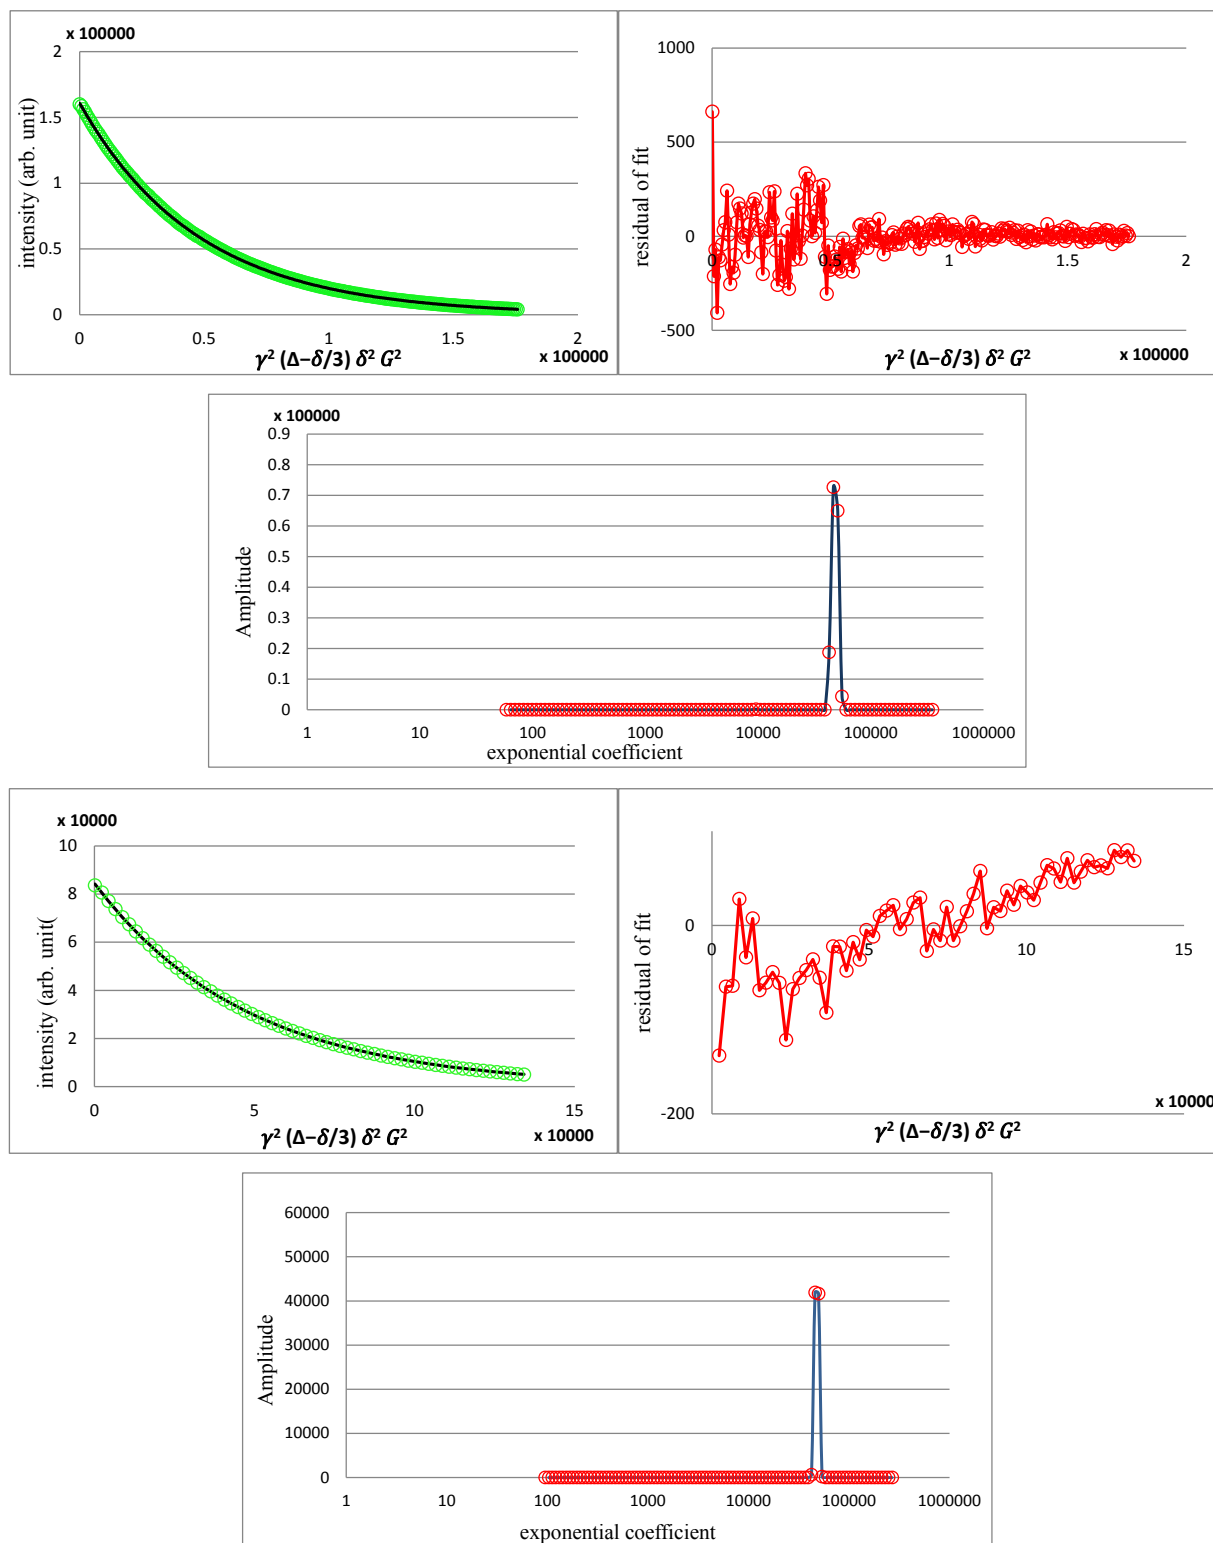

**Figure S3.** NMR diffusimetry: self-diffusion of water in suspended aerogel. Experimental curves (upper left corner), and inverse Laplace transformation and single exponential fitting of these curves. Up:  $\Delta = 16$  ms,  $\delta = 4.0$  ms. Down:  $\Delta = 150$  ms,  $\delta = 1.6$  ms.

#### The validity of Beer's law in the aerogel suspension:

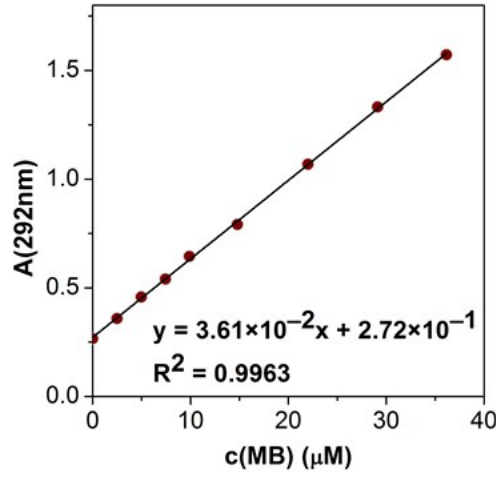

**Figure S4.** Absorbance versus concentration plot of methylene blue (MB) added to an aerogel suspension. The intercept is due to the light scattering of the suspension.  $c(\text{gel}) = 338 \text{ } \mu\text{g/mL}$ ;  $c(\text{NaH}_2\text{PO}_4 + \text{Na}_2\text{HPO}_4) = 50 \text{ mM}$ ;  $\text{pH} = 6.91$ ;  $25 \text{ } ^\circ\text{C}$ ; 1000 rpm stirring.

#### The Langmuir isotherm:

The following equations describe the adsorption equilibrium and account for the mass balances in the Langmuir model:

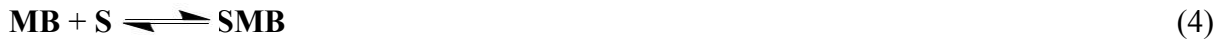

$$K_{ads} = \frac{\theta_{SMB}}{[MB]\theta_S} \quad c_{MB} = [MB] + c_{gel}\theta_{SMB} \quad 1 = \theta_S + \theta_{SMB} \quad (5)$$

where MB is hydrated methylene blue, S represents an unoccupied adsorption site and SMB is the adsorbed dye occupying a site.  $K_{ads}$  is the equilibrium constant of monolayer adsorption. The



total concentration of MB is  $c_{MB}$ . The total concentration of the aerogel is  $c_{gel}$  in g/L units. The number of adsorption sites on the aerogel particles is  $s$  in mol/g units. Thus,  $s$  represents the adsorptive capacity of the aerogel.  $\theta_S$  and  $\theta_{SMB}$  represent the surface coverage of free and occupied sites, respectively. Square brackets denote equilibrium concentrations. ( $[MB]$  is the concentration of hydrated MB in the adsorption equilibrium.) The adsorbed amount of MB can be easily expressed from eq. 5:

$$[MB]_{ads} = c_{gel}s\theta_{SMB}$$

and

$$[MB] = c_{MB} - c_{gel}s\theta_{SMB}$$

Inserting this expression to  $K_{ads}$  in eq. 5 yields:

$$K_{ads} = \frac{\theta_{SMB}}{(c_{MB} - c_{gel}s\theta_{SMB})(1 - \theta_{SMB})}$$

By solving the above second order mathematical equation to give  $\theta_{SMB}$ , the absorbed amount of MB can be expressed as the function of  $c_{MB}$  and  $c_{gel}$ :

$$[MB]_{ads} = c_{gel}s\theta_{SMB} = \frac{1}{2} \left\{ \left( c_{gel}s + c_{MB} + \frac{1}{K_{ads}} \right) - \sqrt{\left( c_{gel}s + c_{MB} + \frac{1}{K_{ads}} \right)^2 - 4c_{MB}c_{gel}s} \right\}$$

In the case, if  $c_{MB} \gg [MB]_{ads}$ :

$$K_{ads} = \frac{\theta_{SMB}}{c_{MB}(1 - \theta_{SMB})}$$

and

$$[MB]_{ads} = c_{gel}s\theta_{SMB} = \frac{K_{ads}c_{MB}c_{gel}s}{1 + K_{ads}c_{MB}}$$

The absorbance of the solution decreases because some dissolved MB is removed by the aerogel. Using Lambert-Beer's law:

$$\Delta A = \varepsilon l [MB]_{ads} = \varepsilon l c_{gel} S \theta_{SMB}$$

The absorbance change due to the depletion of dissolved MB is  $\Delta A$ . The molar absorbance of MB at 292 nm is  $\varepsilon$  and the optical path length of the cuvette is  $l$ :

$$\Delta A = \varepsilon l c_{gel} S \theta_{SMB} = \frac{\varepsilon l}{2} \left( c_{gel} S + c_{MB} + \frac{1}{K_{ads}} \right) - \sqrt{\left( c_{gel} S + c_{MB} + \frac{1}{K_{ads}} \right)^2 - 4 c_{MB}}$$

(6)

### Kinetics of the adsorption of MB on aerogel particles:

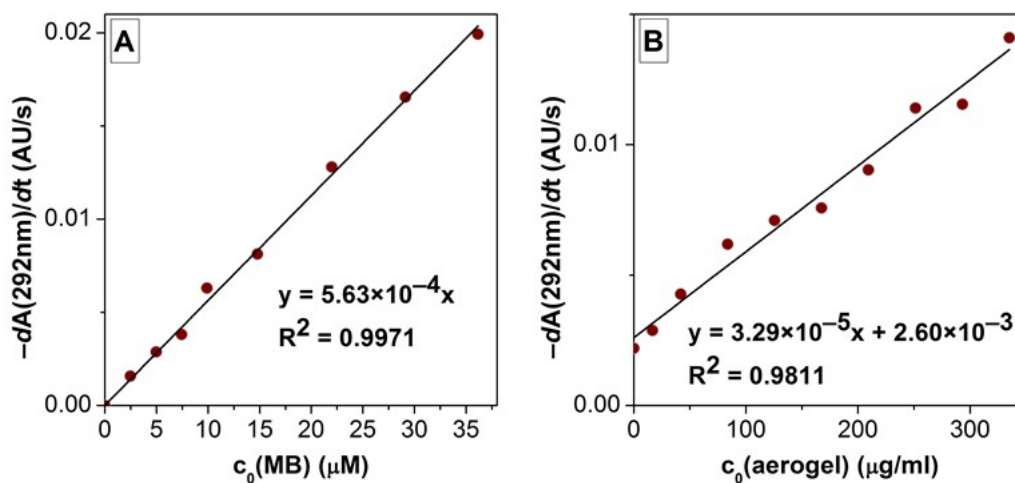

**Figure S5.** Dependence of the initial rate of adsorption on the initial concentration of MB (A) and on the initial concentration of the aerogel in suspension (B). Dots are experimental data points. Continuous lines are the results of linear data fitting.  $c(NaH_2PO_4 + Na_2HPO_4) = 50$  mM; pH = 6.93 (A), 6.91 (B); 25 °C; 1000 rpm stirring.

**Aggregation of aerogel particles following the adsorption of MB:**

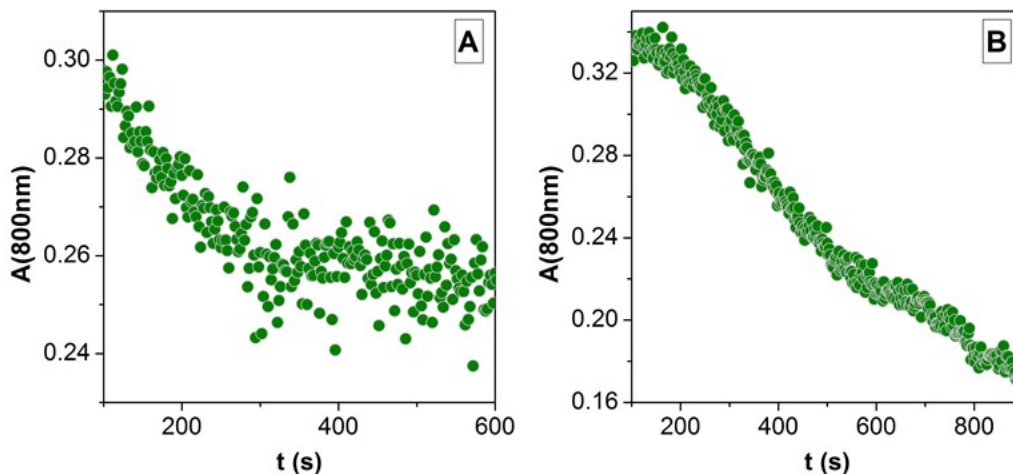

**Figure S6.** The aggregation of aerogel particles following the adsorption of MB. The absorbance decreases because the light scattering of the particles decreases. Methylene blue does not absorb at 800 nm. A: Aged aerogel suspension:  $c(\text{gel}) = 340 \mu\text{g/mL}$ ;  $c(\text{MB}) = 22.0 \mu\text{M}$ . B: Fresh aerogel suspension:  $c(\text{gel}) = 341 \mu\text{g/mL}$ ;  $c(\text{MB}) = 45.3 \mu\text{M}$ .  $c(\text{NaH}_2\text{PO}_4 + \text{Na}_2\text{HPO}_4) = 50 \text{ mM}$ ;  $\text{pH} = 6.93$  (A),  $6.96$  (B);  $25^\circ\text{C}$ ;  $1000 \text{ rpm}$  stirring.
